# Supplementary material
Source: PubMed Central journal article supplement (PMC9263817)
Supplement: 10456_2022_9844_MOESM1_ESM.pdf [file 10456_2022_9844_MOESM1_ESM.pdf]

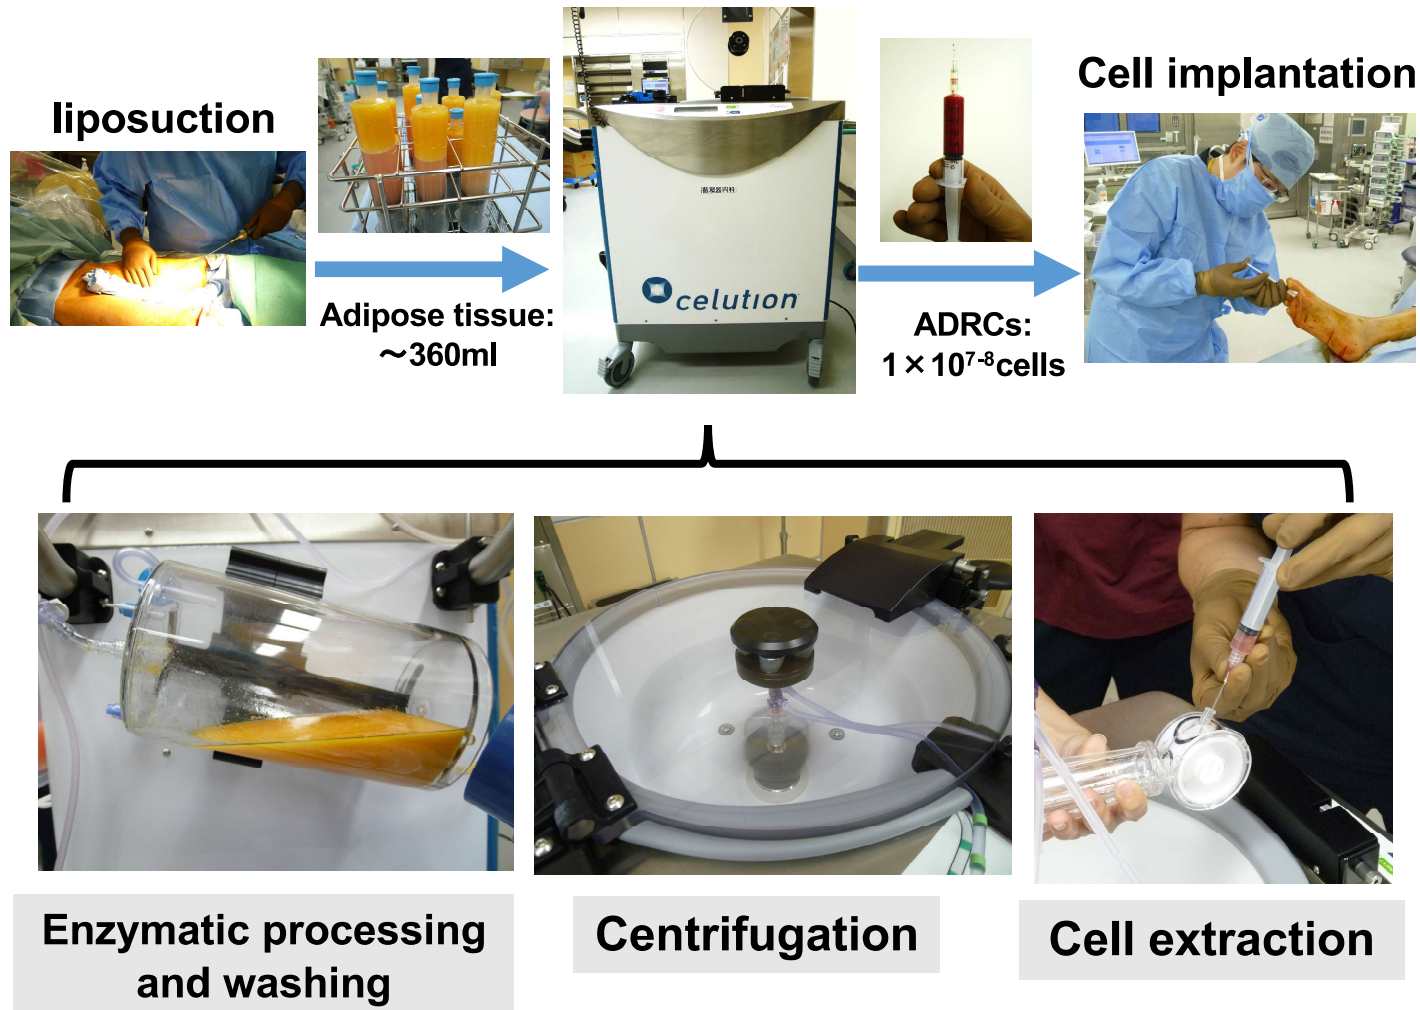

**Pre**

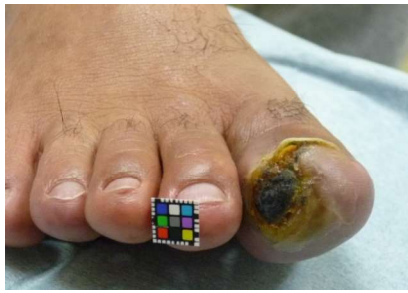

**4 week**

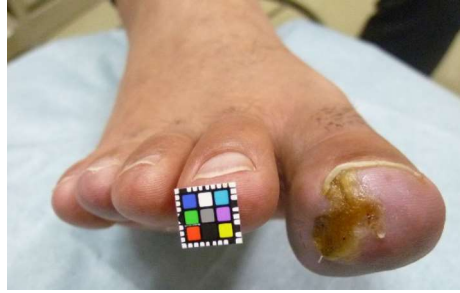

**24 week**

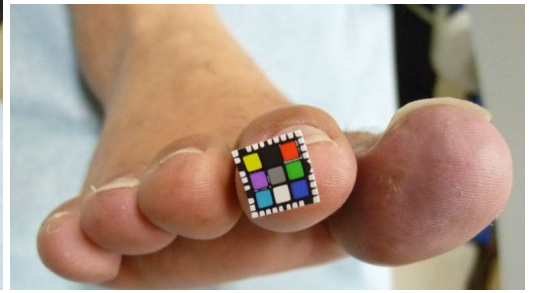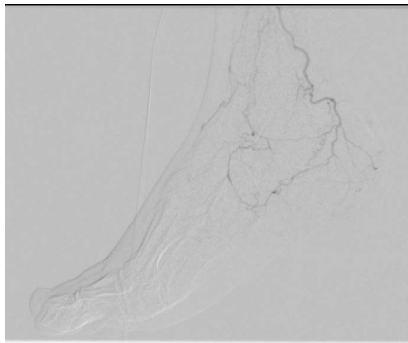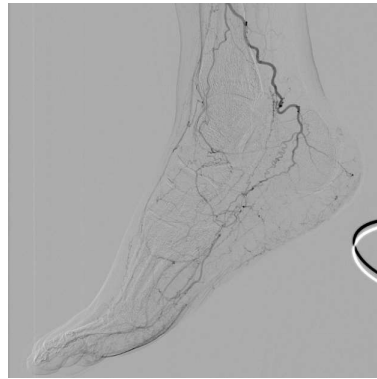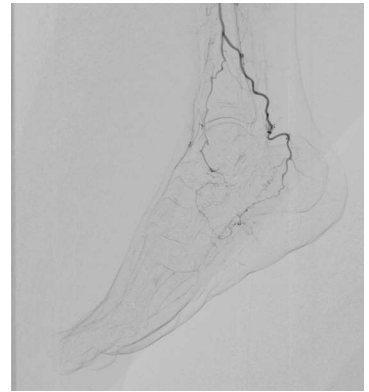

**Supplemental Figure 2**

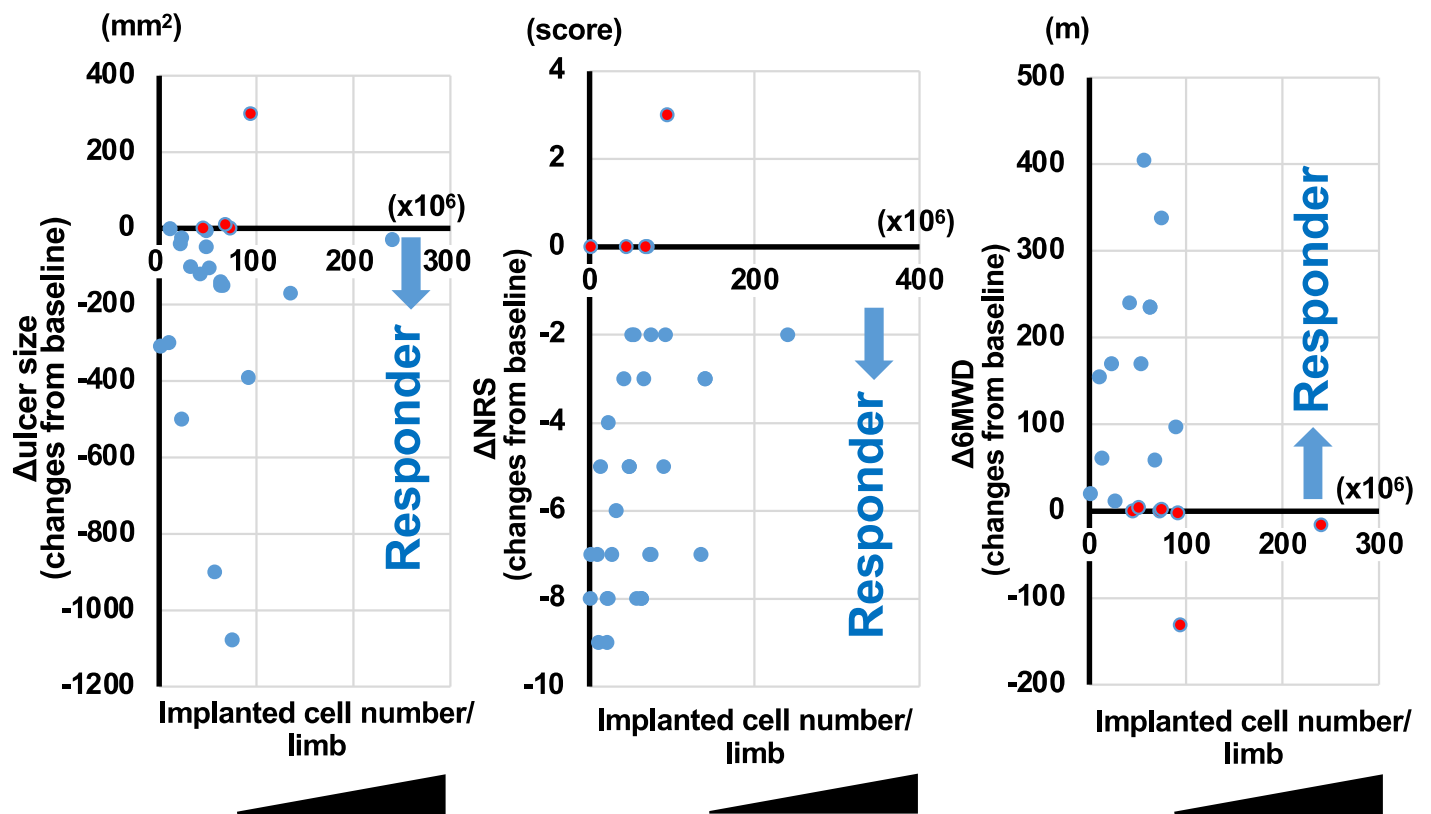

Supplemental Figure 3

| Patient No. | Age | Gender | etiology | Target limb           | Fontaine class | Rest pain (NRS) | Ulcer size (mm2)    |
|-------------|-----|--------|----------|-----------------------|----------------|-----------------|---------------------|
| 1           | 45  | M      | TAO      | left lower limb       | IV             | 8               | 100                 |
| 2           | 26  | F      | TAO      | right upper limb      | IV             | 3               | 150                 |
| 3           | 43  | M      | TAO      | left lower limb       | IV             | 8               | 900                 |
| 4           | 60  | F      | CTD      | left lower limb       | IV             | 5               | gangrene            |
| 5           | 48  | M      | TAO      | right lower limb      | IV             | 3               | 119                 |
| 6           | 74  | F      | CTD      | right lower limb      | III            | 2               | 0                   |
| 7           | 63  | F      | CTD      | right upper limb      | IV             | 10              | 170                 |
| 8           | 58  | M      | CTD      | bilateral lower limbs | IV             | 8               | right 150; left 140 |
| 9           | 75  | F      | CTD      | left lower limb       | IV             | 10              | 195                 |
| 10          | 76  | F      | CTD      | left lower limb       | IV             | 7               | 7                   |
| 11          | 40  | F      | CTD      | left lower limb       | IV             | 4               | 30                  |
| 12          | 77  | M      | ASO      | left lower limb       | IV             | 6               | 30                  |
| 13          | 46  | M      | TAO      | bilateral upper limbs | IV             | 5               | right 48; left 6    |
| 14          | 41  | F      | CTD      | right lower limb      | IV             | 5               | gangrene            |
| 15          | 51  | M      | CTD      | bilateral upper limbs | IV             | 8               | gangrene            |
| 16          | 70  | F      | CTD      | bilateral upper limbs | III            | 3               | 0                   |
| 17          | 45  | M      | TAO      | right lower limb      | IV             | 4               | 25                  |
| 18          | 66  | F      | CTD      | bilateral upper limbs | IV             | 9               | 40                  |
| 19          | 47  | M      | ASO      | left lower limb       | IV             | 9               | 500                 |
| 20          | 69  | M      | ASO      | right lower limb      | IV             | 9               | 6                   |
| 21          | 66  | M      | ASO      | right lower limb      | IV             | 5               | 12                  |
| 22          | 68  | F      | CTD      | left lower limb       | IV             | 8               | 368                 |
| 23          | 63  | M      | ASO      | right upper limb      | IV             | 7               | 3                   |
| 24          | 72  | F      | CTD      | right lower limb      | IV             | 9               | 2178                |
| 25          | 50  | M      | ASO      | left lower limb       | III            | 7               | 0                   |
| 26          | 76  | M      | ASO      | left lower limb       | III            | 5               | 0                   |
| 27          | 54  | M      | CTD      | left lower limb       | IV             | 2               | 390                 |
| 28          | 32  | M      | CTD      | right lower limb      | IV             | 6               | 900                 |
| 29          | 77  | F      | CTD      | left lower limb       | IV             | 2               | 104                 |
